# Supplementary material
Source: PubMed Central journal article supplement (PMC2847059)
Supplement: NIHMS169615-supplement-01.pdf [file NIHMS169615-supplement-01.pdf]

**Supplementary Table 1** Primer sequences used for quantitative real-time PCR.

| Gene         | Primer                                                     |
|--------------|------------------------------------------------------------|
| L7           | F: GAAAGGCAAGGAGGAAGCTCATCT<br>R: AATCTCAGTGCGGTACATCTGCCT |
| mouse<br>K8  | F: GGACATCGAGATCACCACCT<br>R: TGAAGCCAGGGCTAGTGAGT         |
| mouse<br>K18 | F: CAAGTCTGCCGAAATCAGGGAC<br>R: TCCAAGTTGATGTTCTGGTTTT     |
| p62          | F: AGCTGCCCTCAGCCCTCTA<br>R: GGCTTCTCTTCCCTCCATGTT         |

**A**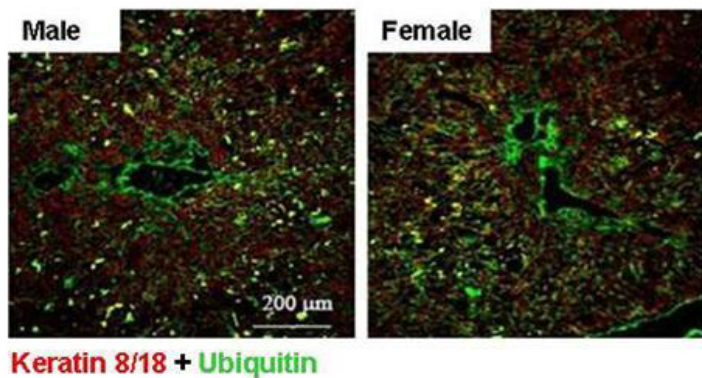**B**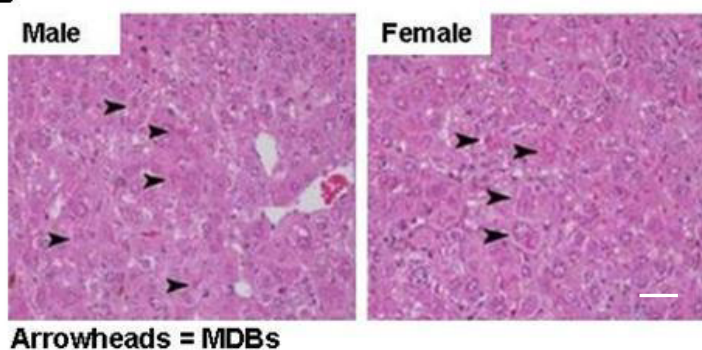**C**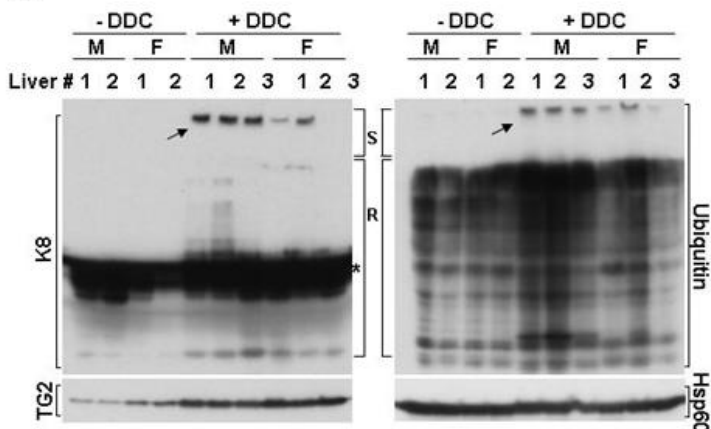**D**

|     | # of MDBs  |              |
|-----|------------|--------------|
|     | Male (n=5) | Female (n=5) |
| H&E | 22.7±13.2* | 13.3±11.9*   |
| FL  | 125.2±19** | 68.8±19.4**  |

\* $P < 0.01$ , \*\* $P < 0.05$

**Supplementary Figure 1** Gender dimorphic formation of Mallory-Denk Bodies (MDBs) in the livers of mouse K8-overexpressing mice. (A) MDB detection by immunofluorescence (FL) staining of K8/K18 (red) and Ub (green) in male and female mice fed DDC for 90 days (scale bar represents 200  $\mu\text{m}$ ). (B) Routine histological analysis for the presence of MDBs (scale bar represents 100  $\mu\text{m}$ ) (C) Biochemical analysis for the presence of high molecular weight K8 and Ub-containing complexes (arrows) in stacking gels (S), K8 monomer and Ub conjugates in resolving gels (R), and expression of TG2 and Hsp60 in control and DDC-fed male and female mice (D) Quantitative assessment of MDB formation by FL and H&E analysis

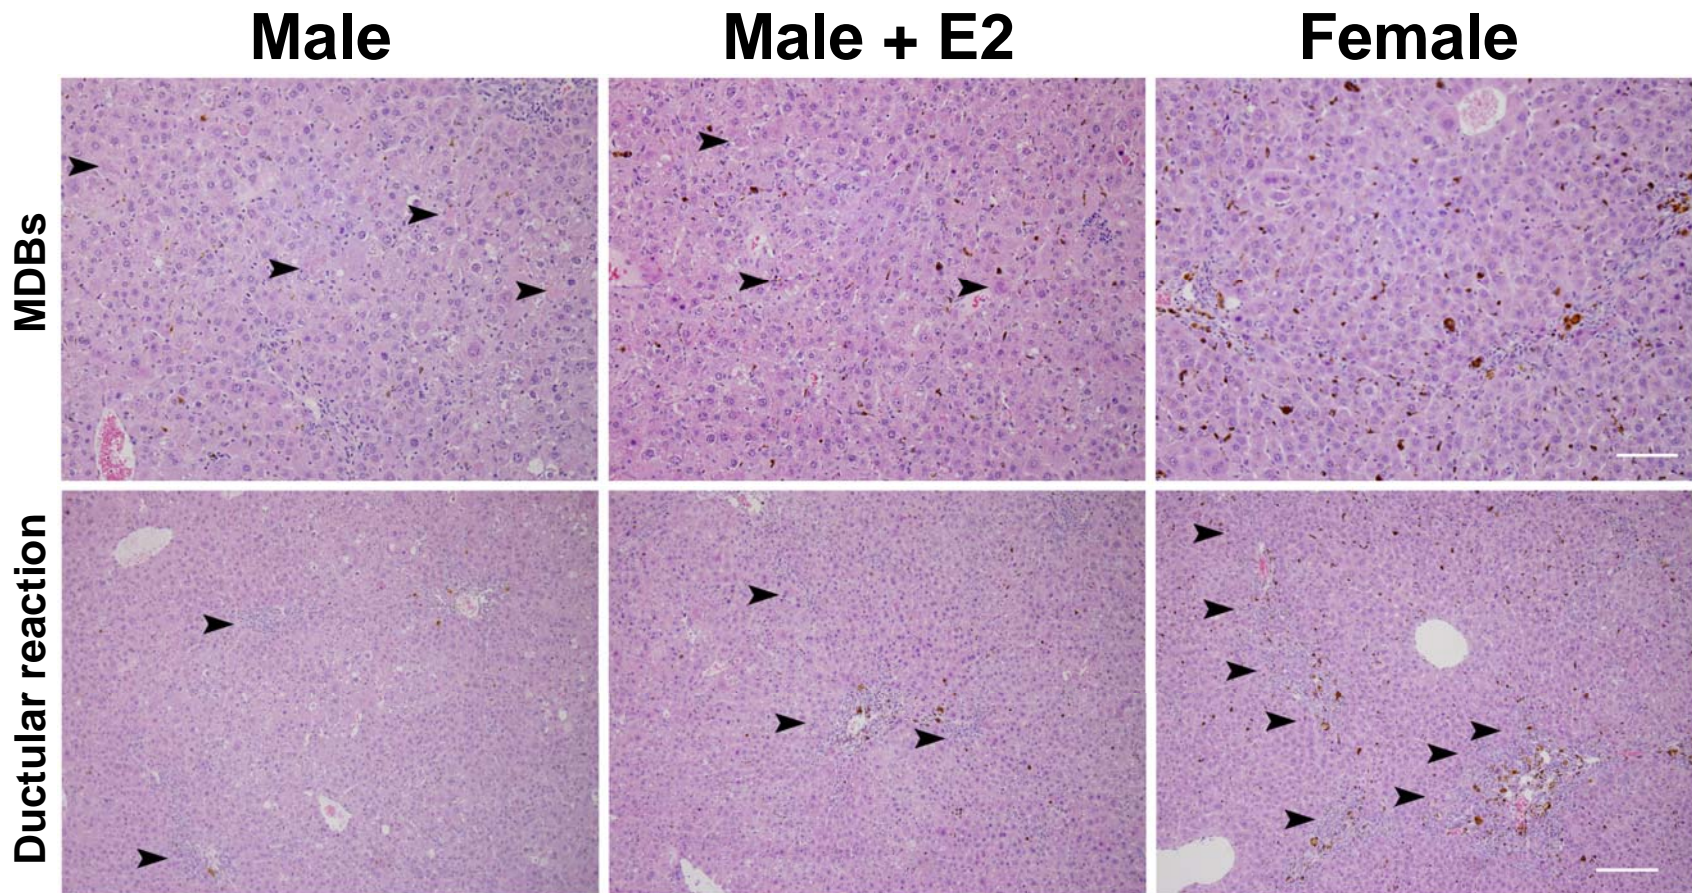

**Supplementary Figure 2** Histological analysis for the presence of Mallory-Denk bodies (MDBs) and ductular reaction in the livers of male, female, and estradiol (E2)-treated male FVB/N mice fed DDC for 90 days. Top three panels show MDBs (scale bar represents 100  $\mu\text{m}$ ) and bottom three panels show ductular reaction (scale bar represents 250  $\mu\text{m}$ ), each denoted by the arrowheads.

**A**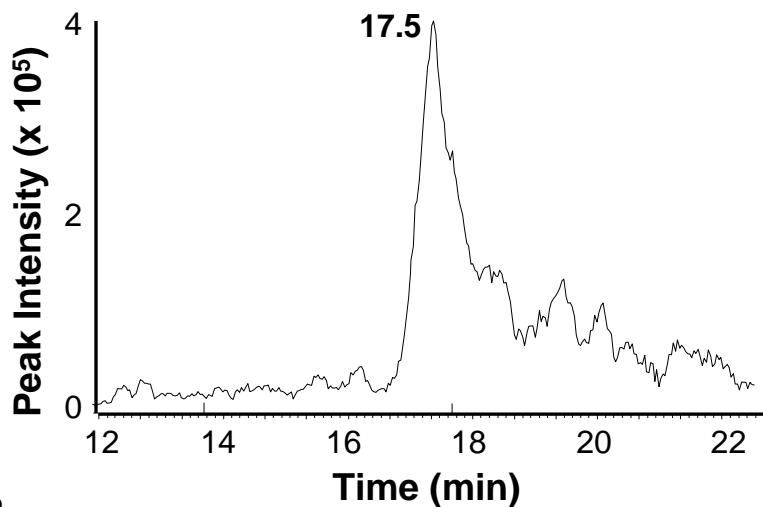**B**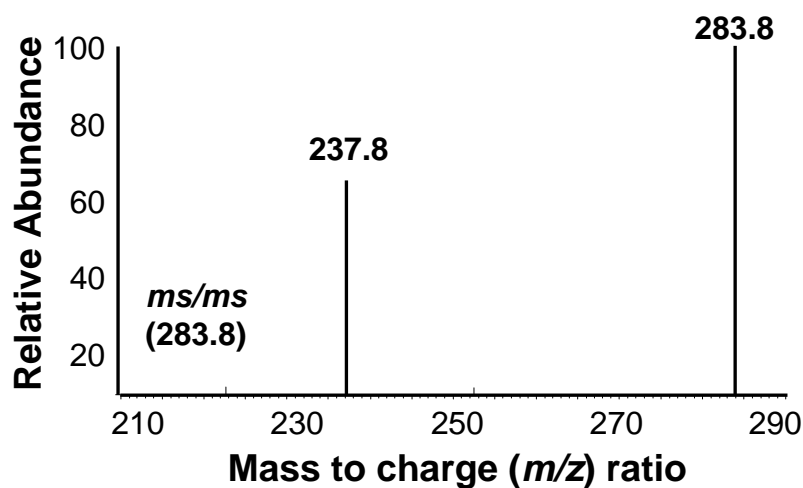

**Supplementary Figure 3** Metabolism of DDC by human recombinant CYP3A4. **(A)** Formation of a monooxygenated DDC product ( $m/z$  283.8; retention time 17.54 min) upon incubation of DDC with human recombinant CYP3A4 in the presence of NADPH, as described in Materials and Methods. **(B)** Tandem MS of the DDC metabolite showing the precursor ion ( $m/z$  283.8) and a fragment ion ( $m/z$  237.8; loss of CH<sub>3</sub>CH<sub>2</sub>OH).
